# Supplementary material for: Genetic markers for urine haptoglobin is associated with decline in renal function in type 2 diabetes in East Asians
Source: PubMed Central journal article supplement (PMC5865208; doi:10.1038/s41598-018-23407-1), 2018-03-23
Supplement: 41598_2018_23407_MOESM1_ESM.pdf [file 41598_2018_23407_MOESM1_ESM.pdf]

## Supplementary Information

### **Genetic markers for urine haptoglobin is associated with decline in renal function in type 2 diabetes in East Asians**

Resham Lal Gurung<sup>1#</sup>, Rajkumar Dorajoo<sup>2#</sup>, Sylvia Liu<sup>1</sup>, Yiamunaa M<sup>1</sup>, Jian-Jun Liu<sup>1</sup>, Ling Wang<sup>2</sup>, Lin Guo<sup>3</sup>, Xueqing Yu<sup>4</sup>, Jian-Jun Liu<sup>2, 5\*</sup>, Su Chi Lim<sup>1, 6, 7\*</sup>

<sup>1</sup>Clinical Research Unit, Khoo Teck Puat Hospital, Singapore, <sup>2</sup> Human Genetics, Genome Institute of Singapore, Agency for Science, Technology and Research, Singapore, <sup>3</sup>The First Affiliated Hospital, Sun Yat-sen University, China, <sup>4</sup> Guangdong Medical University, China, <sup>5</sup>Yong Loo Lin School of Medicine, National University of Singapore, Singapore, <sup>6</sup>Diabetes Centre, Khoo Teck Puat Hospital, Singapore, <sup>7</sup>Saw Swee Hock School of Public Health, National University Hospital, Singapore

10 Supplementary tables

4 Supplementary figures

**Supplementary Table S1.** Details of DN cohort GWAS sample QC filters utilized in study.

---

|                                                 |                                                                |
|-------------------------------------------------|----------------------------------------------------------------|
| Total samples genotyped                         | 2,664                                                          |
| Samples with call-rate < 95%                    | 4                                                              |
| Samples with extremes in heterozygosity (> 3SD) | 55                                                             |
| Known positive controls                         | 12                                                             |
| Cryptic related samples                         | 96                                                             |
| PCA outliers                                    | 127                                                            |
| Remaining samples                               | 1,869 Chinese samples, 450 Malay samples and 51 Indian samples |
| Samples with phenotype                          | 236 Chinese samples, 57 Malay samples and 45 Indian samples    |

---

**Supplementary Table S2.** Details of DN cohort GWAS SNP QC filters utilized in this study.

|                                          | <b>Chinese</b> | <b>Malays</b> |
|------------------------------------------|----------------|---------------|
| N                                        | 236            | 57            |
| Total SNPs                               | 853,994        | 853,994       |
| Non-autosomal SNPs                       | 23,250         | 23,250        |
| SNPs with call-rate < 95%                | 523            | 945           |
| Monomorphic and rare SNPs (MAF < 1%)     | 48,434         | 54,504        |
| SNPs with HWE p-value < 10 <sup>-4</sup> | 8              | 2             |
| Remaining SNPs that pass QC              | 781,779        | 775,293       |

**Supplementary Table S3:** Comparison of association study results for novel SNP (rs75444904) and rs217181 in linear regression analysis adjusted for principle component 1 in Chinese datasets and principle components 1-3 in Malay dataset, linear regression adjusted for 10 eigenvalues in all datasets and GEMMA. All analyses were additionally adjusted for age and sex.

| SNP                                                                                                                                  | Chr | Pos      | TA | OA | TAF   | DN Chinese (N=236) |          | DN Malay (N=57) |                  |        | SMART2D Chinese (N=512) |                  |          | Meta (N=805)     |          |       | I <sup>2</sup> |
|--------------------------------------------------------------------------------------------------------------------------------------|-----|----------|----|----|-------|--------------------|----------|-----------------|------------------|--------|-------------------------|------------------|----------|------------------|----------|-------|----------------|
|                                                                                                                                      |     |          |    |    |       | $\beta$ (SE)       | P        | TAF             | $\beta$ (SE)     | P      | TAF                     | $\beta$ (SE)     | P        | $\beta$ (SE)     | P        | P_het |                |
| <b><i>Linear regression adjusted for principle component 1 in Chinese datasets and principle components 1-3 in Malay dataset</i></b> |     |          |    |    |       |                    |          |                 |                  |        |                         |                  |          |                  |          |       |                |
| kgp16506790/<br>rs75444904                                                                                                           | 16  | 72095650 | C  | A  | 0.307 | 0.732<br>(0.082)   | 1.07E-16 | 0.219           | 0.705<br>(0.214) | 0.0018 | 0.275                   | 0.807<br>(0.059) | 3.98E-41 | 0.777<br>(0.047) | 1.21E-60 | 0.717 | 0              |
| rs217181                                                                                                                             | 16  | 72114002 | T  | C  | 0.335 | 0.592<br>(0.086)   | 5.33E-11 | 0.272           | 0.469<br>(0.226) | 0.0316 | 0.319                   | 0.648<br>(0.061) | 2.11E-25 | 0.621<br>(0.048) | 1.45E-36 | 0.667 | 10             |
| <b><i>Linear regression adjusted for 10 eigenvalues</i></b>                                                                          |     |          |    |    |       |                    |          |                 |                  |        |                         |                  |          |                  |          |       |                |
| kgp16506790/<br>rs75444904                                                                                                           | 16  | 72095650 | C  | A  | 0.307 | 0.710<br>(0.082)   | 5.65E-16 | 0.219           | 0.681<br>(0.215) | 0.0040 | 0.275                   | 0.800<br>(0.059) | 2.32E-40 | 0.765<br>(0.047) | 6.66E-59 | 0.621 | 0              |
| rs217181                                                                                                                             | 16  | 72114002 | T  | C  | 0.335 | 0.581<br>(0.086)   | 2.56E-11 | 0.272           | 0.438<br>(0.242) | 0.0760 | 0.319                   | 0.647<br>(0.061) | 2.35E-25 | 0.617<br>(0.048) | 1.44E-35 | 0.617 | 10             |
| <b><i>Mixed model regression analysis in GEMMA</i></b>                                                                               |     |          |    |    |       |                    |          |                 |                  |        |                         |                  |          |                  |          |       |                |
| kgp16506790/<br>rs75444904                                                                                                           | 16  | 72095650 | C  | A  | 0.307 | 0.727<br>(0.082)   | 2.22E-16 | 0.219           | 0.686<br>(0.214) | 0.0024 | 0.275                   | 0.810<br>(0.060) | 5.04E-39 | 0.776<br>(0.047) | 7.74E-60 | 0.653 | 0              |
| rs217181                                                                                                                             | 16  | 72114002 | T  | C  | 0.335 | 0.588<br>(0.086)   | 8.35E-11 | 0.272           | 0.451<br>(0.212) | 0.0382 | 0.319                   | 0.647<br>(0.061) | 5.59E-24 | 0.619<br>(0.048) | 3.88E-36 | 0.614 | 0              |

**Abbreviations:** Chr, chromosome number; TA, test allele; OA, other allele; TAF, test allele frequency; P\_het, Cochran's Q heterogeneity p-value; I<sup>2</sup>, heterogeneity index.

**Supplementary Table S4.** Urine and plasma haptoglobin levels among Haptoglobin genotype stratified by ethnicity.

|                    | Chinese |                       |                                  |                      | Malay |                       |                      |                      | Total                                |                                    |                                     |
|--------------------|---------|-----------------------|----------------------------------|----------------------|-------|-----------------------|----------------------|----------------------|--------------------------------------|------------------------------------|-------------------------------------|
|                    | N       | Progressors<br>(n, %) | urine HP<br>(ng/ml) <sup>l</sup> | plasma HP<br>(µg/ml) | N     | Progressors<br>(n, %) | urine HP<br>(ng/ml)  | plasma HP<br>(µg/ml) | Progressors<br>(n, %) <sup>c,d</sup> | urine HP<br>(ng/ml) <sup>a,b</sup> | plasma HP<br>(µg/ml) <sup>a,b</sup> |
| <b>HP genotype</b> |         |                       |                                  |                      |       |                       |                      |                      |                                      |                                    |                                     |
| HP 1-1             | 28      | 9<br>(32.1)           | 4667<br>(674-17048)              | 1431<br>(1051-1835)  | 7     | 6<br>(85.7)           | 1659<br>(1356-97227) | 1418<br>(1186-1697)  | 15<br>(42.9)                         | 4292<br>(921-18050)                | 1421<br>(1113-1754)                 |
| HP 2-1             | 103     | 42<br>(40.8)          | 474<br>(89-2213)                 | 1277<br>(952-1732)   | 27    | 17<br>(63.0)          | 1237<br>(113-4883)   | 1554<br>(930-1860)   | 59<br>(45.4)                         | 511<br>(91-2309)                   | 1327<br>(1005-1709)                 |
| HP 2-2             | 119     | 32<br>(26.9)          | 28<br>(2-195)                    | 867<br>(473-1202)    | 43    | 17<br>(39.5)          | 159<br>(5-836)       | 982<br>(810-1287)    | 49<br>(30.2)                         | 41<br>(2-304)                      | 902<br>(565-1158)                   |
| <b>rs75444904</b>  |         |                       |                                  |                      |       |                       |                      |                      |                                      |                                    |                                     |
| CC                 | 28      | 9<br>(32.1)           | 4667<br>(433-17048)              | 1419<br>(1007-1835)  | 1     | 1<br>(100)            | 10442                | 1527                 | 10<br>(34.5)                         | 5041<br>(457-16046)                | 1419<br>(1014-1794)                 |
| AC                 | 89      | 38<br>(42.7)          | 474<br>(96-2316)                 | 1257<br>(1008-1658)  | 23    | 15<br>(65.2)          | 1657<br>(288-15271)  | 1393<br>(1026-1680)  | 53<br>(47.3)                         | 584<br>(139-2532)                  | 1298<br>(1012-1671)                 |
| AA                 | 119     | 30<br>(25.2)          | 29<br>(2-227)                    | 861<br>(473-1126)    | 33    | 15<br>(45.5)          | 188<br>(7-743)       | 994<br>(822-1599)    | 45<br>(29.6)                         | 54<br>(3-352)                      | 895<br>(556-1192)                   |

Data described are median (interquartile range). <sup>a</sup> significant difference among HP genotype P<0.0001; <sup>b</sup>significant difference among rs75444904 P<0.0001

<sup>c</sup> significant difference among HP genotype P<0.05; <sup>d</sup>significant difference among rs75444904 P<0.05.

**Supplementary Table S5.** Conditional probability analysis of association of urine haptoglobin (zHCR) and HP genotype and rs75444904.

|         | HP         |          |                 |                 | HP adj for rs75444904 |          |                 |              | rs75444904 |          |                 |          | rs75444904 adj for HP |          |                 |                 |
|---------|------------|----------|-----------------|-----------------|-----------------------|----------|-----------------|--------------|------------|----------|-----------------|----------|-----------------------|----------|-----------------|-----------------|
|         | DN Chinese | DN Malay | SMART2D Chinese | Meta            | DN Chinese            | DN Malay | SMART2D Chinese | Meta         | DN Chinese | DN Malay | SMART2D Chinese | Meta     | DN Chinese            | DN Malay | SMART2D Chinese | Meta            |
| N       | 236        | 57       | 500             | 793             | 236                   | 57       | 500             | 793          | 236        | 57       | 512             | 805      | 236                   | 57       | 500             | 793             |
| $\beta$ | 0.790      | 0.628    | 0.708           | 0.727           | 0.616                 | 0.516    | 0.074           | 0.264        | 0.732      | 0.705    | 0.807           | 0.777    | 0.186                 | 0.193    | 0.740           | 0.543           |
| SE      | 0.082      | 0.159    | 0.059           | 0.046           | 0.227                 | 0.243    | 0.131           | 0.103        | 0.082      | 0.214    | 0.059           | 0.047    | 0.226                 | 0.317    | 0.137           | 0.110           |
| P       | 8.83E-19   | 7.50E-05 | 2.32E-32        | <b>1.42E-55</b> | 7.00E-03              | 0.039    | 0.572           | <b>0.010</b> | 1.07E-16   | 1.81E-03 | <b>3.98E-41</b> | 1.21E-60 | 0.410                 | 0.545    | 7.05E-08        | <b>8.22E-07</b> |
| P_het   |            |          |                 | 0.580           |                       |          |                 | 0.069        |            |          |                 | 0.717    |                       |          |                 | 0.056           |

**Abbreviations:** HP, Haptoglobin genotype; P\_het, Cochran's Q heterogeneity p-value.

**Supplementary Table S6.** Genome-wide levels of associations for urine and plasma z-HP levels in the discovery stage of the study and their corresponding association levels in the validation datasets.

| SNP                | Chr | Pos      | TA | Discovery stage   |                  |          | Replication stage |                  |          |                        |                  |          | Meta-analysis (N=805) |          |       |                |
|--------------------|-----|----------|----|-------------------|------------------|----------|-------------------|------------------|----------|------------------------|------------------|----------|-----------------------|----------|-------|----------------|
|                    |     |          |    | DN Chinese(N=236) |                  |          | DN Malay(N=57)    |                  |          | SMART2D Chinese(N=512) |                  |          | $\beta$ (SE)          | P        | P_het | I <sup>2</sup> |
|                    |     |          |    | TAF               | $\beta$ (SE)     | P        | TAF               | $\beta$ (SE)     | P        | TAF                    | $\beta$ (SE)     | P        |                       |          |       |                |
| <i>urine z-HP</i>  |     |          |    |                   |                  |          |                   |                  |          |                        |                  |          |                       |          |       |                |
| rs75444904         | 16  | 72095650 | C  | 0.307             | 0.732<br>(0.082) | 1.07E-16 | 0.219             | 0.705<br>(0.214) | 1.80E-03 | 0.275                  | 0.807<br>(0.059) | 3.98E-41 | 0.777<br>(0.047)      | 1.21E-60 | 0.717 | 0              |
| rs217181           | 16  | 72114002 | T  | 0.335             | 0.592<br>(0.086) | 5.33E-11 | 0.272             | 0.469<br>(0.212) | 3.20E-02 |                        | 0.648<br>(0.061) | 2.11E-25 | 0.621<br>(0.048)      | 1.45E-36 | 0.667 | 0              |
| <i>Plasma z-HP</i> |     |          |    |                   |                  |          |                   |                  |          |                        |                  |          |                       |          |       |                |
| rs75444904         | 16  | 72095650 | C  | 0.307             | 0.583<br>(0.088) | 2.08E-10 | 0.219             | 0.438<br>(0.251) | 0.087    | NA                     | NA               | NA       | 0.567<br>(0.083)      | 6.51E-12 | 0.586 | 0              |
| rs217181           | 16  | 72114002 | T  | 0.335             | 0.414<br>(0.091) | 9.38E-06 |                   | 0.254<br>(0.238) | 2.93E-01 | NA                     | NA               | NA       | 0.384<br>(0.084)      | 4.24E-06 | 0.329 | 0.7            |

Data analysis was adjusted for age, sex and Principal Components (PC1 for Chinese and PC1-3 for Malay). **Abbreviations:** Chr, chromosome number; TA, test allele; TAF, test allele frequency; P\_het, Cochran's Q heterogeneity p-value; I<sup>2</sup>, heterogeneity index; NA, not available.

**Supplementary Table S7.** Conditional probability analysis of association of urine haptoglobin (zHCR) and rs217181 and rs75444904.

|         | rs217181   |          |                 |                 | rs217181 adj for rs75444904 |          |                 |              | rs75444904 |          |                 |                 | rs75444904 adj for rs217181 |          |                 |                 |
|---------|------------|----------|-----------------|-----------------|-----------------------------|----------|-----------------|--------------|------------|----------|-----------------|-----------------|-----------------------------|----------|-----------------|-----------------|
|         | DN Chinese | DN Malay | SMART2D Chinese | Meta            | DN Chinese                  | DN Malay | SMART2D Chinese | Meta         | DN Chinese | DN Malay | SMART2D Chinese | Meta            | DN Chinese                  | DN Malay | SMART2D Chinese | Meta            |
| N       | 236        | 57       | 512             | 805             | 236                         | 57       | 512             | 805          | 236        | 57       | 512             | 805             | 236                         | 57       | 512             | 805             |
| $\beta$ | 0.592      | 0.469    | 0.648           | 0.621           | -0.418                      | -0.298   | -0.262          | -0.308       | 0.732      | 0.705    | 0.80667         | 0.777           | 1.11                        | 0.967    | 1.048           | 1.060           |
| SE      | 0.086      | 0.212    | 0.061           | 0.048           | 0.195                       | 0.372    | 0.128           | 0.103        | 0.082      | 0.214    | 0.059           | 0.047           | 0.196                       | 0.397    | 0.131           | 0.105           |
| P       | 5.33E-11   | 3.20E-02 | 2.11E-25        | <b>1.45E-36</b> | 0.033                       | 0.428    | 0.040           | <b>0.003</b> | 1.07E-16   | 1.80E-03 | 3.98E-41        | <b>1.21E-60</b> | 1.60E-08                    | 0.018    | 1.55E-15        | <b>8.64E-23</b> |
| P_het   |            |          |                 | 0.660           |                             |          |                 | 0.799        |            |          |                 | 0.717           |                             |          |                 | 0.938           |

Data analysis was adjusted for age, sex and Principal Components (PC1 for Chinese and PC1-3 for Malay). **Abbreviations:** P\_het, Cochran's Q heterogeneity p-value.



**Supplementary Table S8.** Association of rs75444904 and HP 1 allele and DKD progression.

|        | HP1               |                 |              | rs75444904        |                 |              |
|--------|-------------------|-----------------|--------------|-------------------|-----------------|--------------|
|        | <b>DN Chinese</b> | <b>DN Malay</b> | <b>Meta</b>  | <b>DN Chinese</b> | <b>DN Malay</b> | <b>Meta</b>  |
| OR     | 1.66              | 6.13            | 1.91         | 1.66              | 3.03            | 1.77         |
| 95% CI | 1.17-2.14         | 4.73-7.53       | 1.45-2.37    | 1.18-2.14         | 1.64-4.43       | 1.32-2.23    |
| P      | 0.042             | 0.011           | <b>0.006</b> | 0.038             | 0.119           | <b>0.014</b> |
| P_het  |                   |                 | 0.084        | 0.799             |                 | 0.425        |

Data represents odd ratios (OR) and 95% CI adjusted for age, sex, BMI, HbA1c, diabetes duration, systolic BP, TG, LDL-C, HDL-C, eGFR, uACR and RAS antagonist and insulin usage. Abbreviations: P\_het, Cochran's Q heterogeneity p-value. Bold values represent statistically significant data.

**Supplementary Table S9.** Number of participants (n, %) in each rs75444904 genotype in the validation study cohorts.

| rs75444904<br>Genotype | DN Chinese   |               |               | DN Malay     |              |               | SMART2D Chinese |               |               | SMART2D Malay |              |              | Chinese      |              |              |
|------------------------|--------------|---------------|---------------|--------------|--------------|---------------|-----------------|---------------|---------------|---------------|--------------|--------------|--------------|--------------|--------------|
|                        | Case         | Control       | Total         | Case         | Control      | Total         | Case            | Control       | Total         | Case          | Control      | Total        | Case         | Control      | Total        |
| AA                     | 91<br>(20.6) | 350<br>(79.4) | 441<br>(50.1) | 56<br>(42.4) | 76<br>(57.6) | 132<br>(58.9) | 7<br>(3.3)      | 203<br>(96.7) | 210<br>(53.7) | 7<br>(11.9)   | 52<br>(88.1) | 59<br>(56.2) | 38<br>(64.4) | 21<br>(35.6) | 59<br>(50.4) |
| CA                     | 81<br>(23.4) | 265<br>(76.6) | 346<br>(39.3) | 37<br>(47.4) | 41<br>(52.6) | 78<br>(34.8)  | 10<br>(6.5)     | 143<br>(93.5) | 153<br>(39.1) | 5<br>(16.7)   | 25<br>(83.3) | 30<br>(28.6) | 33<br>(78.6) | 9<br>(21.4)  | 42<br>(35.9) |
| CC                     | 22<br>(23.4) | 72<br>(76.6)  | 94<br>(10.7)  | 9<br>(64.3)  | 5<br>(35.7)  | 14<br>(6.3)   | 1<br>(3.6)      | 27<br>(96.4)  | 28<br>(7.2)   | 2<br>(12.5)   | 14<br>(87.5) | 16<br>(15.2) | 11<br>(68.8) | 5<br>(31.3)  | 16<br>(13.7) |

Frequency of genotype within ESRD (Case) or Control group in independent validation cohort.

**Supplementary Table S10.** Mediation analysis of urine haptoglobin or LDL cholesterol on the HP1 and DKD progression adjudged for traditional DKD risk factors age, gender, ethnicity, HbA1c, Diabetes duration, SBP, TG, eGFR and uACR.

| <u>X=HP1 , M=uHP, Y= DKD progression</u> |              |                   | <u>X=HP1 , M=LDL-C, Y= DKD progression</u> |              |              |
|------------------------------------------|--------------|-------------------|--------------------------------------------|--------------|--------------|
|                                          | $\beta$      | P                 |                                            | $\beta$      | P            |
| X--> Y                                   | <b>0.600</b> | <b>0.005</b>      | X--> Y                                     | <b>0.600</b> | <b>0.005</b> |
| X--> M                                   | <b>2.502</b> | <b>&lt;0.0001</b> | X--> M                                     | 0.040        | 0.069        |
| M-->Y                                    | <b>0.183</b> | <b>&lt;0.0001</b> | M-->Y                                      | 0.905        | 0.081        |
| X+ M--> Y                                |              |                   | X+ M--> Y                                  |              |              |
| X                                        | 0.242        | 0.320             | X                                          | <b>0.577</b> | <b>0.007</b> |
| M                                        | <b>0.158</b> | <b>0.003</b>      | M                                          | 0.801        | 0.130        |
| X + M + X*M--> Y                         |              |                   |                                            |              |              |
| X                                        | 0.496        | 0.356             |                                            |              |              |
| M                                        | <b>0.177</b> | <b>0.006</b>      |                                            |              |              |
| X*M                                      | -0.038       | 0.595             |                                            |              |              |

Regression coefficient ( $\beta$ ) and P values are given. Bold values represent statistically significant data.

**Supplementary Figure S1.** PCA plot (PC1 vs PC2) of DN dataset Chinese, Malay and Indian subjects with 1000 Genome reference populations. Samples in yellow boxes identified as outliers and excluded from analyses.

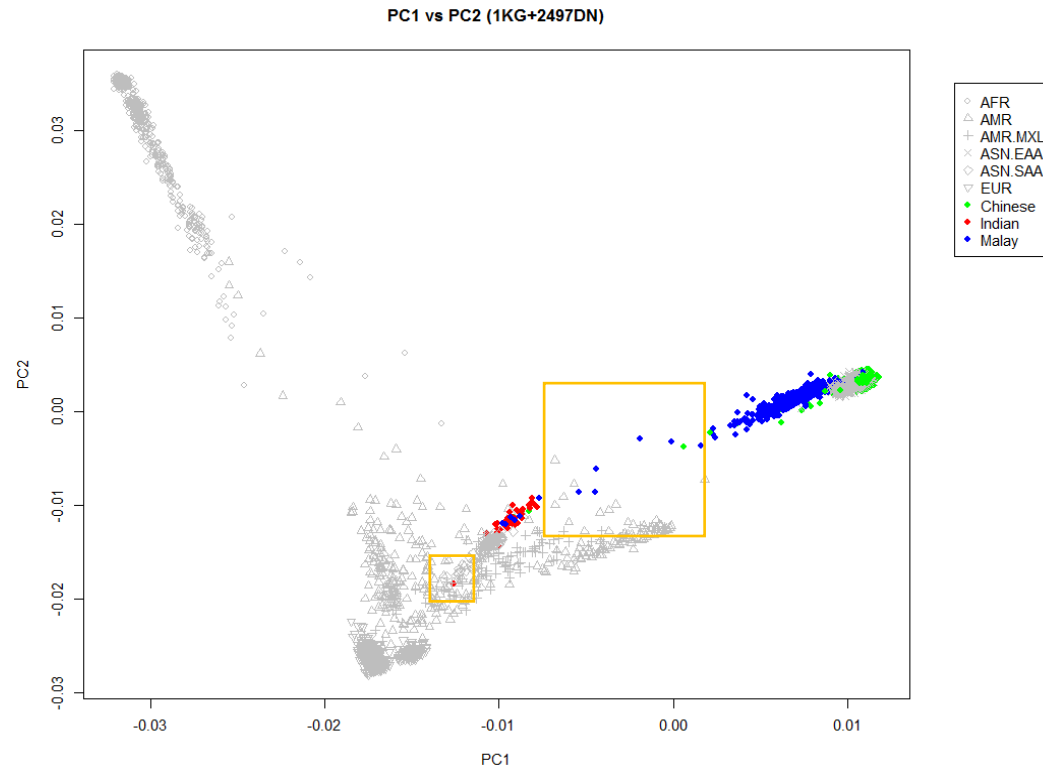

**Supplementary Figure S2.** PCA plot (PC1 vs PC2) of DN dataset Chinese, Malay and Indian subjects. Samples in yellow boxes assigned as Indian, Malay and Chinese ethnic groups.

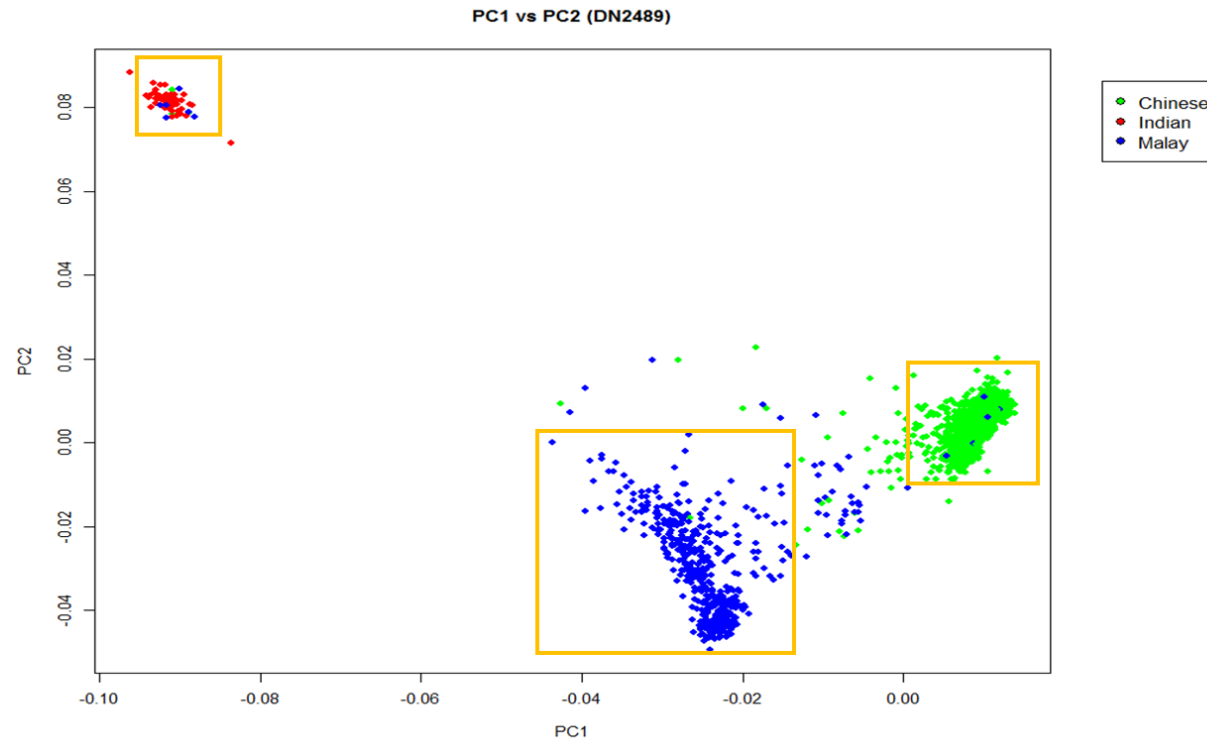

**Supplementary Figure S3.** QQ-plot of observed and expected p-values for urine z-HP associations in A) discovery stage DN Chinese samples (N=236,  $\lambda = 1.003$ ); B) validation stage DN Malay samples (N=57,  $\lambda = 1.027$ ); C) validation stage SMART2D Chinese samples (N=512,  $\lambda = 1.004$ ).

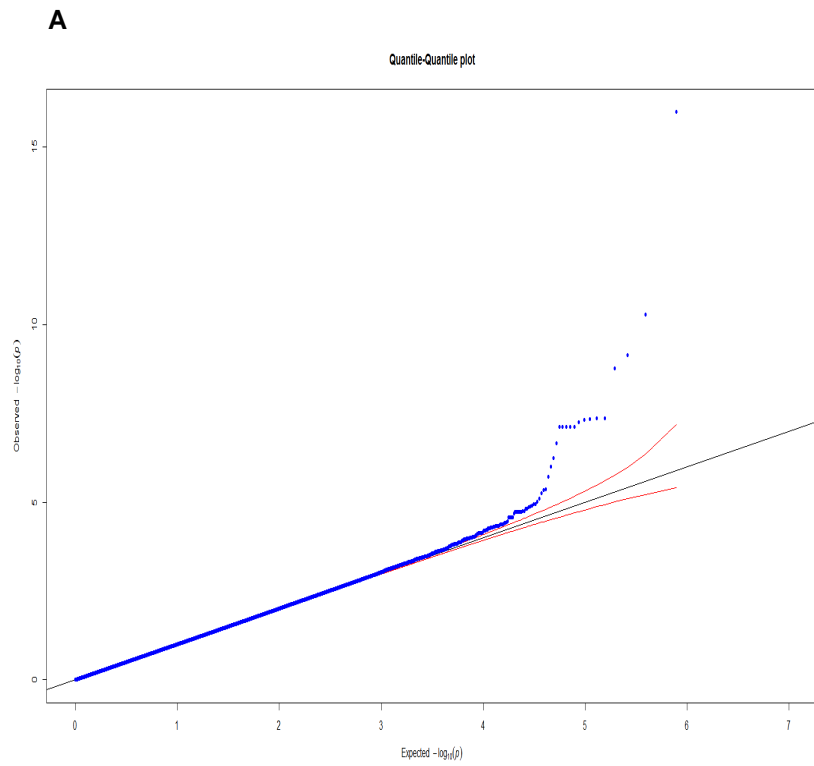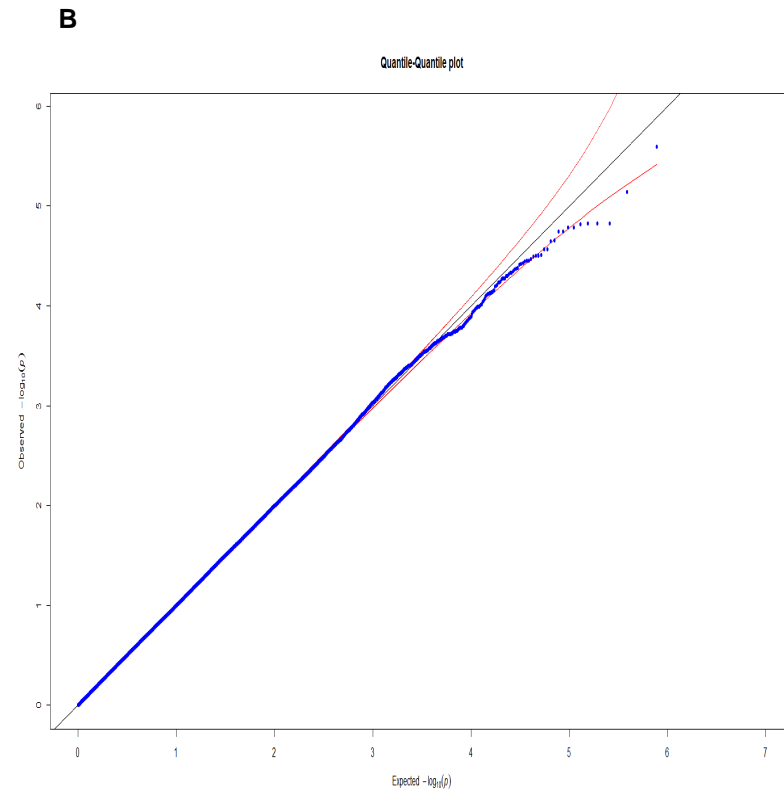

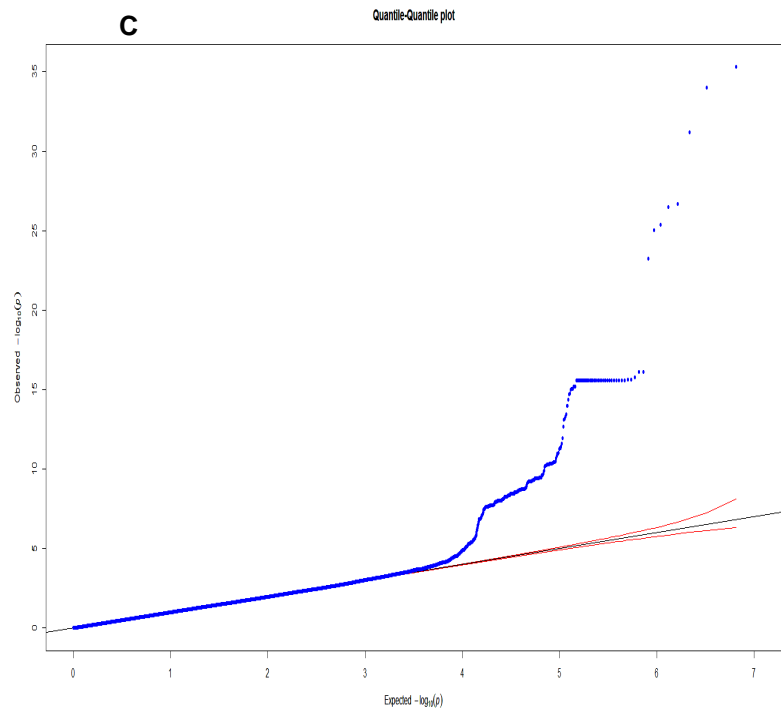

**Supplementary Figure S4.** QQ-plot of observed and expected p-values for plasma z-HP associations in A) discovery stage DN Chinese samples (N=236,  $\lambda = 0.999$ ) and B) validation stage DN Malay samples (N=57,  $\lambda = 0.990$ ).

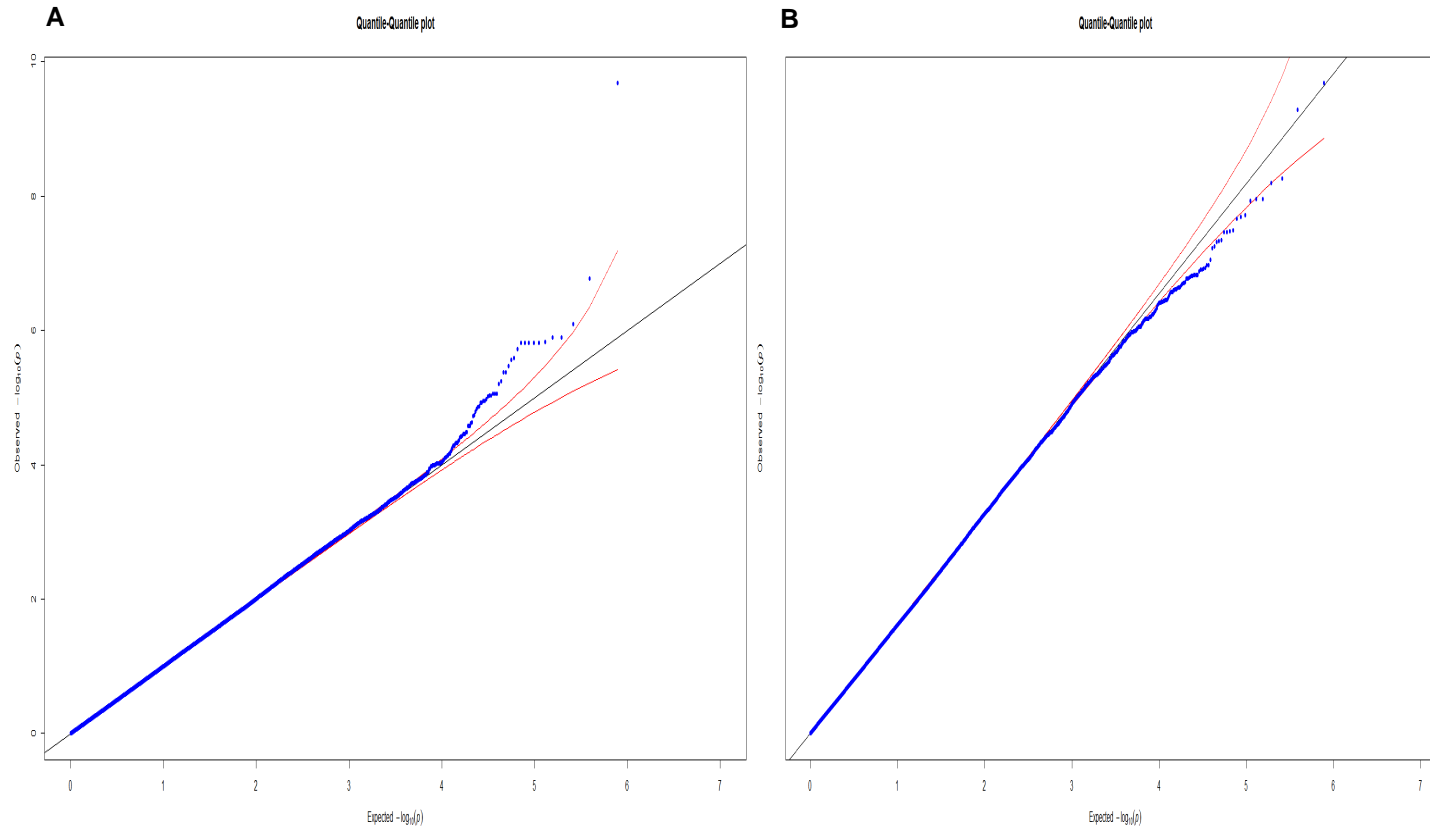



**Supplementary Methods:**

Participant's recruitment details in Chinese (Ch) validation Cohort:

The Chinese samples consist of 82 T2D-related ESRD cases and 34 T2D-related controls and were collected during the period from October 2015 to December 2016. The ESRD cases samples were collected from 7 hospitals, The First Affiliated Hospitals of Sun Yat-sen University, The Third Affiliated Hospitals of Sun Yat-sen University, Kaiping Central Hospital, Guizhou Provincial People's Hospital, Jieyang People's Hospital, The First Affiliated Hospital of Zhengzhou University and Lanzhou University Second Hospital. Participants who had been diagnosed type 2 diabetic kidney disease with an eGFR less than 15mL/min/1.73m<sup>2</sup> were recruited in cases group. The T2D-related controls samples were collected from the First Affiliated Hospitals of Sun Yat-sen University. Patients who had been diagnosed type 2 diabetes for more than 10 years without proteinuria or microvascular were recruited. Written informed consent forms were obtained from all participants.
